# Supplementary material
Source: Springer Nature journal article supplement (https://www.springermedizin.de/resource/supplementary/12889_2008_1491_MOESM2_ESM.pdf/9504408)
Supplement: MOESM2 [file 9504408]

### Overweight

0.5 1 2 4 16

### Obese

0.5 1 2 4 16 32

| Study                       | Obesity | Sex | Age         | F-up | Country               | N      | Outcome | Risk Est (95% CI)  | Risk Est (95% CI)  |
|-----------------------------|---------|-----|-------------|------|-----------------------|--------|---------|--------------------|--------------------|
| Huang (1999) [44]           | WC      | F   | 55+         | 8    | US                    | 5865   | IRR     | 1.22 (1.04 - 1.42) | 1.26 (1.05 - 1.52) |
| Folsom (2000) [19]          | WC      | F   | 55-69       | 10.1 | US                    | 31702  | IRR     | 1.05 (0.90 - 1.23) | 1.31 (1.16 - 1.48) |
| Sellers (2002) [32]         | WC      | F   | 55-69       | 13   | US                    | 32573  | RR-P    | 1.16 (1.02 - 1.32) | 1.34 (1.20 - 1.49) |
|                             |         |     | IRR:        |      | All studies (2)       |        |         | 1.13 (1.01 - 1.27) | 1.30 (1.17 - 1.44) |
|                             |         |     | RR-P:       |      | All studies (1)       |        |         | 1.16 (1.02 - 1.32) | 1.34 (1.20 - 1.49) |
| Sweeney (2004) [33]         | BMI     | F   | 56-84       | 16   | US                    | 36658  | IRR     | 1.20 (1.09 - 1.33) | 1.30 (1.17 - 1.43) |
| Dirx (2001) [34]            | BMI     | F   | 55-69       | 7.3  | Netherlands           | 62537  | IRR     | 1.18 (1.03 - 1.35) | 1.07 (0.85 - 1.35) |
| Tornberg (1994) [35]        | BMI     | F   | 55-75       | 20.3 | Sweden                | 47003  | IRR     | 1.13 (0.98 - 1.30) | 1.21 (1.04 - 1.42) |
| Jonsson (2003) [36]         | BMI     | F   | 44-83       | 26   | Sweden                | 11598  | IRR     | 1.10 (1.00 - 1.40) | 1.20 (0.80 - 1.60) |
| Navarro Silvera (2006) [37] | BMI     | F   | 40-59       | 16.4 | Canada                | 40318  | IRR     | 1.09 (0.98 - 1.22) | 1.04 (0.88 - 1.22) |
| Chang (2006) [38]           | BMI     | F   | 55-74       | 9.3  | US                    | 27541  | IRR     | 1.09 (0.93 - 1.28) | 0.99 (0.82 - 1.19) |
| Suzuki (2006) [39]          | BMI     | F   | 55-70       | 8.3  | Sweden                | 51823  | IRR     | 1.06 (0.94 - 1.19) | 1.15 (0.96 - 1.37) |
| Tehard (2004) [40]          | BMI     | F   | 40-65       | 9.7  | France                | 41427  | IRR     | 1.06 (0.92 - 1.20) | 1.38 (1.10 - 1.75) |
| McTiernan (2003) [41]       | BMI     | F   | 50-79       | 4.7  | US                    | 74171  | IRR     | 0.97 (0.87 - 1.09) | 1.02 (0.91 - 1.14) |
| Lukanova (2006) [42]        | BMI     | F   | 49+         | 8.3  | Sweden                | 35362  | IRR     | 0.92 (0.74 - 1.13) | 1.06 (0.81 - 1.39) |
| Sellers (2002) [32]         | BMI     | F   | 55-69       | 13   | US                    | 32549  | RR-P    | 1.27 (1.14 - 1.41) | 1.38 (1.22 - 1.57) |
| Lukanova (2006) [42]        | BMI     | F   | 49+         | 8.3  | Sweden                | 35362  | RR-P    | 1.19 (0.96 - 1.47) | 1.40 (1.07 - 1.83) |
| Suzuki (2006) [39]          | BMI     | F   | 55-70       | 8.3  | Sweden                | 51823  | RR-P    | 1.10 (0.98 - 1.24) | 1.17 (0.99 - 1.39) |
| Barlow (2006) [43]          | BMI     | F   | 45-84       | 6    | US                    | 729129 | RR-P    | 1.06 (0.99 - 1.13) | 1.09 (1.01 - 1.18) |
| McTiernan (2003) [41]       | BMI     | F   | 50-79       | 4.7  | US                    | 74171  | RR-P    | 0.96 (0.86 - 1.07) | 0.98 (0.88 - 1.10) |
|                             |         |     | IRR:        |      | All studies (10)      |        |         | 1.08 (1.03 - 1.14) | 1.13 (1.05 - 1.22) |
|                             |         |     | RR-P:       |      | All studies (5)       |        |         | 1.11 (1.01 - 1.22) | 1.17 (1.04 - 1.32) |
|                             |         |     | IRR & RR-P: |      | All studies (12)      |        |         | 1.10 (1.04 - 1.15) | 1.15 (1.07 - 1.23) |
|                             |         |     | IRR:        |      | F-up>=5 yrs (9)       |        |         | 1.10 (1.05 - 1.16) | 1.15 (1.07 - 1.24) |
|                             |         |     | RR-P:       |      | F-up>=5 yrs (4)       |        |         | 1.15 (1.05 - 1.25) | 1.23 (1.09 - 1.37) |
|                             |         |     | IRR & RR-P: |      | F-up>=5 yrs (11)      |        |         | 1.11 (1.06 - 1.17) | 1.17 (1.09 - 1.25) |
|                             |         |     | IRR:        |      | min.age>=55 (5)       |        |         | 1.13 (1.07 - 1.21) | 1.17 (1.07 - 1.28) |
|                             |         |     | RR-P:       |      | min.age>=55 (2)       |        |         | 1.18 (1.06 - 1.32) | 1.28 (1.12 - 1.47) |
|                             |         |     | IRR & RR-P: |      | min.age>=55 (6)       |        |         | 1.15 (1.08 - 1.23) | 1.20 (1.10 - 1.31) |
|                             |         |     | IRR:        |      | US/Canada studies (4) |        |         | 1.08 (0.99 - 1.18) | 1.10 (0.98 - 1.23) |
|                             |         |     | IRR:        |      | Europe studies (6)    |        |         | 1.09 (1.02 - 1.15) | 1.30 (1.02 - 1.65) |
|                             |         |     | RR-P:       |      | US studies (3)        |        |         | 1.09 (0.95 - 1.24) | 1.14 (0.97 - 1.34) |
|                             |         |     | RR-P:       |      | Europe studies (2)    |        |         | 1.12 (1.01 - 1.24) | 1.23 (1.06 - 1.42) |
|                             |         |     | IRR & RR-P: |      | US/Canada studies (6) |        |         | 1.10 (1.02 - 1.19) | 1.14 (1.03 - 1.26) |
|                             |         |     | IRR & RR-P: |      | Europe studies (6)    |        |         | 1.09 (1.02 - 1.15) | 1.30 (1.02 - 1.65) |

0.5 1 2 4 16

RR

0.5 1 2 4 16 32

RR
